# Supplementary material
Source: MDPI journal article supplement (https://www.mdpi.com/2073-4441/15/18/3304)
Supplement: s1 [file s1]

## Supplementary Materials

**Table S1** Features and sources of the data to determine the trend and breakpoints in the Poyang Lake

| <i>Items (mg/L)</i> | <i>Data year</i>            | <i>Source</i>      | <i>Frequency</i> |
|---------------------|-----------------------------|--------------------|------------------|
| TN and TP           | 1978-2008                   | [109]              | Annual           |
| TN and TP           | 1983, 1987, 1993, 2003-2010 | [110]              | Seasonal/Annual  |
| TN and TP           | 1987-1993                   | [111]              | Annual           |
| TN and TP           | 1988                        | [112]              | Annual           |
| TP                  | 1981-1990                   | [113]              | Annual           |
| TN                  | 1992, 1993                  | [114]              | Monthly          |
| TN and TP           | 1994                        | [115]              | Seasonal         |
| TN and TP           | 2000, 2006                  | [116]              | Annual/Monthly   |
| TN and TP           | 2004                        | [117]              | Monthly          |
| TN and TP           | 2005, 2006                  | [118]              | Monthly          |
| TN and TP           | 2005, 2006                  | [119]              | Monthly          |
| TN                  | 2005, 2006                  | [120]              | Monthly          |
| TN and TP           | 2008, 2009                  | [121]              | Seasonal/Monthly |
| TP                  | 2009                        | [122]              | Annual/Seasonal  |
| TN and TP           | 2009                        | [123]              | Monthly          |
| TN                  | 2010                        | [124]              | Monthly          |
| TN and TP           | 2010                        | [125]              | Monthly          |
| TN and TP           | 2010, 2011                  | [126]              | Monthly          |
| TN and TP           | 2011                        | [127]              | Monthly          |
| TN and TP           | 2011                        | [128]              | Monthly          |
| TN and TP           | 2011                        | [129]              | Monthly          |
| TN and TP           | 2011                        | [130]              | Monthly          |
| TN and TP           | 2011                        | [131]              | Monthly          |
| TN and TP           | 2012                        | [132]              | Monthly          |
| TN and TP           | 2012                        | [133]              | Monthly          |
| TN and TP           | 2019, 2020                  | [134]              | Annual           |
| TN and TP           | 2013-2016                   | PLHB <sup>1</sup>  | Seasonal/Monthly |
| TN and TP           | 2017-2021                   | PLWER <sup>2</sup> | Seasonal         |

<sup>1</sup> Poyang Lake Hydrological Bureau; <sup>2</sup> Poyang Laboratory for Wetland Ecosystem Research.
